# Supplementary material for: Using Detached Industrial Hemp Leaf Inoculation Assays to Screen for Varietal Susceptibility and Product Efficacy on Botrytis cinerea
Source: MDPI journal article supplement (doi:10.3390/plants12183278), 2023-09-15
Supplement: s1 [file s1]

## Supplementary Materials

**Table S1.** Average daily lesion length results from four repeated experiments (Exp A & B) screening the efficacy of products against *B. cinerea*. Different letters represent significant difference between treated and untreated within experiments.

| Product                                        | Ave daily lesion length (mm) |        |        |        |         |        |            |            |
|------------------------------------------------|------------------------------|--------|--------|--------|---------|--------|------------|------------|
|                                                | Exp 1A                       | Exp 1B | Exp 2A | Exp 2B | Exp 3A  | Exp 3B | Exp 4A     | Exp 4B     |
| 5                                              | 3.75a                        | 1.18a  |        |        |         |        |            |            |
| 4                                              | 3.80a                        | 1.13a  |        |        |         |        |            |            |
| 3                                              | 7.40b                        | 6.25b  |        |        |         |        |            |            |
| 2                                              | 7.45b                        | 6.92b  |        |        |         |        |            |            |
| 1                                              | 7.72b                        | -      |        |        |         |        |            |            |
| 9                                              |                              |        | 1.19a  | 4.05a  |         |        |            |            |
| 8                                              |                              |        | 2.21a  | 6.06a  |         |        |            |            |
| 6                                              |                              |        | 7.72b  | 8.15b  |         |        |            |            |
| 7                                              |                              |        | 11.29c | 8.37b  |         |        |            |            |
| 14                                             |                              |        |        |        | 1.05a   | 0.88a  |            |            |
| 13                                             |                              |        |        |        | 4.20ab  | 1.68a  |            |            |
| 12                                             |                              |        |        |        | 6.38bc  | 7.97cd |            |            |
| 11                                             |                              |        |        |        | 6.59bcd | 6.37bc |            |            |
| 10                                             |                              |        |        |        | 8.00cd  | 4.72b  |            |            |
| 16                                             |                              |        |        |        |         |        | Phytotoxic | Phytotoxic |
| 17                                             |                              |        |        |        |         |        | 2.77a      | 4.83a      |
| 20                                             |                              |        |        |        |         |        | 5.78b      | 6.90bc     |
| 18                                             |                              |        |        |        |         |        | 6.29bc     | 5.71ab     |
| 19                                             |                              |        |        |        |         |        | 7.89cd     | 8.33cd     |
| 21                                             |                              |        |        |        |         |        | 8.16cd     | 8.42cd     |
| 15                                             |                              |        |        |        |         |        | 8.69d      | 8.18cd     |
| 22                                             |                              |        |        |        |         |        | 9.50d      | 9.24d      |
| Untreated Control<br>( <i>B. cinerea</i> plug) | 8.27b                        | 6.53b  | 12.17c | 8.76b  | 9.76d   | 9.43d  | 8.77d      | 9.12d      |
| p-value                                        | 0.018                        | <0.001 | <0.001 | <0.001 | <0.001  | <0.001 | <0.001     | <0.001     |
| LSD                                            | 3.252                        | 1.660  | 2.308  | 2.26   | 2.132   | 1.918  | 1.199      | 1.016      |
| Replicates (n)                                 | 5                            | 20     | 20     | 20     | 20      | 20     | 20         | 20         |

**Table S2.** Detached leaf assay results for four repeated experiments screening the efficacy of products with amended pH against *B. cinerea*. Different letters represent significant difference between treated and untreated within experiments.

| Treatment                                   | Ave daily lesion length (mm) |         |         |         |        |         |        |        |
|---------------------------------------------|------------------------------|---------|---------|---------|--------|---------|--------|--------|
| Product                                     | Exp 5A                       | Exp 5B  | Exp 6A  | Exp 6B  | Exp 7A | Exp 7B  | Exp 8A | Exp 8B |
| Treatment 14 pH3                            | 7.71cd                       | 6.00cd  |         |         |        |         |        |        |
| Treatment 14 pH4                            | 4.51abc                      | 3.59abc |         |         |        |         |        |        |
| Treatment 14 pH5                            | 8.28cd                       | 2.30ab  |         |         |        |         |        |        |
| Treatment 14 pH6                            | 5.53bc                       | 5.12bcd |         |         |        |         |        |        |
| Treatment 14 pH7                            | 5.11bc                       | 8.67de  |         |         |        |         |        |        |
| Treatment 14 pH8                            | 2.75ab                       | 7.93de  |         |         |        |         |        |        |
| Treatment 14 pH9                            | 1.01a                        | 3.17abc |         |         |        |         |        |        |
| Treatment 14 pH10                           | 4.92abc                      | 1.33a   |         |         |        |         |        |        |
| Treatment 8 pH3                             |                              |         | 2.80ab  | 7.65c   |        |         |        |        |
| Treatment 8 pH4                             |                              |         | 5.30abc | 4.73bc  |        |         |        |        |
| Treatment 8 pH5                             |                              |         | 6.30bc  | 5.35bc  |        |         |        |        |
| Treatment 8 pH6                             |                              |         | 2.07a   | 4.35abc |        |         |        |        |
| Treatment 8 pH7                             |                              |         | 4.15abc | 3.76ab  |        |         |        |        |
| Treatment 8 pH8                             |                              |         | 5.58bc  | 3.29ab  |        |         |        |        |
| Treatment 8 pH9                             |                              |         | 4.7abc  | 4.11ab  |        |         |        |        |
| Treatment 8 pH10                            |                              |         | 4.10abc | 1.23a   |        |         |        |        |
| Treatment 5 pH3                             |                              |         |         |         | 8.67de | 5.28ab  |        |        |
| Treatment 5 pH4                             |                              |         |         |         | 9.01ef | 6.76bc  |        |        |
| Treatment 5 pH5                             |                              |         |         |         | 7.72de | 3.78ab  |        |        |
| Treatment 5 pH6                             |                              |         |         |         | 5.88cd | 5.62abc |        |        |
| Treatment 5 pH7                             |                              |         |         |         | 2.49ab | 3.03a   |        |        |
| Treatment 5 pH8                             |                              |         |         |         | 0.20a  | 2.39a   |        |        |
| Treatment 5 pH9                             |                              |         |         |         | 0.68ab | 3.86ab  |        |        |
| Treatment 5 pH10                            |                              |         |         |         | 3.42bc | 2.55a   |        |        |
| Treatment 9 pH3                             |                              |         |         |         |        |         | 0.00a  | 0.00a  |
| Treatment 9 pH4                             |                              |         |         |         |        |         | 0.00a  | 0.00a  |
| Treatment 9 pH5                             |                              |         |         |         |        |         | 0.00a  | 0.00a  |
| Treatment 9 pH6                             |                              |         |         |         |        |         | 2.88b  | 0.97a  |
| Treatment 9 pH7                             |                              |         |         |         |        |         | 1.36ab | 5.22b  |
| Treatment 9 pH8                             |                              |         |         |         |        |         | 0.63a  | 0.00a  |
| Treatment 9 pH9                             |                              |         |         |         |        |         | 0.93ab | 0.00a  |
| Treatment 9 pH10                            |                              |         |         |         |        |         | 1.06ab | 0.00a  |
| Untreated Control ( <i>B. cinerea</i> plug) | 10.94d                       | 11.48e  | 10.94d  | 11.48d  | 11.89f | 8.53c   | 11.89c | 8.53c  |
| p-value                                     | <0.001                       | <0.001  | <0.001  | <0.001  | <0.001 | <0.001  | <0.001 | <0.001 |
| LSD                                         | 2.455                        | 2.209   | 1.996   | 2.03    | 1.769  | 1.961   | 1.367  | 1.349  |
| Replicates (n)                              | 20                           | 20      | 20      | 20      | 20     | 20      | 20     | 20     |
